# Supplementary material
Source: Springer Nature journal article supplement (https://www.springermedizin.de/resource/supplementary/12885_2012_3187_MOESM1_ESM.pdf/9462812)
Supplement: MOESM1 [file 9462812]

**Hispanic women non-compliant with cervical cancer screening guidelines, aged 21-64, identified from medical record review at the YVFWC**

**Women contacted to confirm eligibility & consented**

**Baseline Questionnaire Administered**

**Randomization**

**Control (Usual Care)**

**Low-intensity intervention**

**High-intensity intervention**

**Medical Record review at YVFWC to identify women who complete cervical cancer screening within 7 months of randomization (primary endpoint)**

**Diagnosis**

**Normal Pap test result**

**Abnormal Pap test result**

**Participant enrolled in patient navigator system**

**Secondary endpoint: time from diagnosis to attendance at clinic for treatment**
